# Supplementary material for: N-donor ligand mediated assembly of divalent zinc and cadmium coordination polymers based on 2,3,2′,3′-thiaphthalic acid: structures and properties
Source: Royal Society of Chemistry journal article supplement (doi:10.1039/c2ce06705f), 2012-01-01
Supplement: c2ce06705f.pdf [file c2ce06705f.pdf]

*Supporting Information for the manuscript:*

**N-Donor Ligand Mediated Assembly of Divalent Zinc and Cadmium Coordination Polymers Based on 2,3,2',3'-Thiaphthalic Acid: Syntheses, Structures and Luminescent Properties**

**Jia-Bin Li,<sup>a</sup> Xi-Yan Dong,<sup>a,b</sup> Li-Hui Cao,<sup>a</sup> Shuang-Quan Zang,<sup>a\*</sup> and Thomas. C. W. Mak,<sup>ac</sup>**

<sup>a</sup>The College of Chemistry and Molecular Engineering, Zhengzhou University, Zhengzhou 450001, P. R. China.

<sup>b</sup>Department of Physics and Chemistry, Henan Polytechnic University, Zhengzhou Henan, P. R. China.

<sup>c</sup>Department of Chemistry, The Chinese University of Hong Kong, Shatin, New Territories, Hong Kong SAR, P. R. China.

Author for correspondence: Dr. S.-Q. Zang, E-mail: zangsqzg@zzu.edu.cn.

**This PDF file includes Table S1– S2 and Figure S1-S8**

**Table. S1.** Hydrogen Bonds parameters in **4** and **5**.

**Table. S2.** Emission and excitation maxima wavelengths of **1–5**.

**Figure. S1.** 3D supramolecular network for compound **1**.

**Figure. S2.** In compound **5**, 3D network is formed by the inter-chain C–H $\cdots$  $\pi$  interactions between 2D layers.

**Figure. S3.** Representation of the solvent water found in the channels of compound **5**.

**Figure. S4.** Thermogravimetric curve of the complexes.

**Figure. S5.** X-ray powder diffraction of complex **1**. (a) Simulated from single crystal data. (b) observed for complex **1**. (c) Heated to 100°C at vacuum.

**Figure. S6.** X-ray powder diffraction of complex **2**. (a) Simulated from single crystal data. (b) observed for complex **2**. (c) Heated to 100°C at vacuum.

**Figure. S7.** X-ray powder diffraction of complex **3**. (a) Simulated from single crystal data. (b) observed for complex **3**.

**Figure. S8.** X-ray powder diffraction of complex **4**. (a) Simulated from single crystal data. (b) observed for complex **4**. (c) Heated to 100°C at vacuum.

**Figure. S9.** X-ray powder diffraction of complex **5**. (a) Simulated from single crystal data. (b) observed for complex **5**. (c) Heated to 100°C at vacuum. (d) rehydrated sample for **5**.

**Table S1. Selected hydrogen-bonding geometries for 4 and 5 (in Å, °)**

| O–H···O                   | <i>d</i> (O···H) | <i>d</i> (O···O) | <i>d</i> (H···O) | ∠OHO   |
|---------------------------|------------------|------------------|------------------|--------|
| Compound 4                |                  |                  |                  |        |
| O(W)–H(1WA)···O(7W)#1     | 0.85             | 2.920(4)         | 1.87             | 166.3  |
| O(2W)–H(2WB)···O(7)#2     | 0.85             | 3.035(4)         | 2.34             | 138.8  |
| O(2W)–H(2WA)···O(6W)#3    | 0.85             | 2.782(4)         | 1.95             | 163.4  |
| O(3W)–H(3WA)···O(8)#4     | 0.75             | 2.722(4)         | 1.97             | 179.2  |
| O(3W)–H(3WB)···O(7)       | 0.86             | 3.103(4)         | 2.24             | 179.5  |
| O(5W)–H(5WA)···O(4)#5     | 0.85             | 2.706(3)         | 1.86             | 178.8  |
| O(5W)–H(5WB)···O(10)#6    | 0.75             | 2.743(5)         | 1.99             | 178.8  |
| O(6W)–H(6WA)···O(3W)#7    | 0.85             | 2.888(4)         | 2.37             | 119.6  |
| O(6W)–H(6WB)···O(1)       | 0.85             | 2.782(2)         | 1.95             | 163.9  |
| O(7W)–H(7WA)···O(5)#8     | 0.86             | 2.772(3)         | 1.91             | 177.9  |
| O(7W)–H(7WB)···O(5W)      | 0.75             | 2.810(2)         | 2.14             | 148.0  |
| O(10)–H(10A)···O(2)#9     | 0.82             | 2.652            | 1.83             | 173.5  |
| Compound 5                |                  |                  |                  |        |
| O(5W)–H(5WA)···O(8)#1     | 0.75             | 2.672(2)         | 1.992            | 177.5  |
| O(5W)–H(5WB)···O(12W)     | 0.75             | 2.646(3)         | 1.909            | 167.3  |
| O(6W)–H(6WB)···O(13)#2    | 0.73             | 2.686(1)         | 2.205            | 124.4  |
| O(7W)–H(7WA)···O(15W)#3   | 0.82             | 2.708(4)         | 1.910            | 164.2  |
| O(7W)–H(7WB)···O(16)#4    | 0.83             | 2.687(2)         | 1.901            | 155.9  |
| O(13W)–H(13WA)···O(14)#2  | 0.85             | 2.850(3)         | 2.246            | 128.05 |
| O(13W)–H(13WB)···O(14W)   | 0.85             | 2.674(1)         | 1.900            | 150.8  |
| O(14W)–H(14WA)···O(16)#5  | 0.85             | 2.956(2)         | 2.332            | 130.6  |
| O(14W)–H(14WB)···O(7W)    | 0.75             | 2.772(2)         | 2.324            | 119.5  |
| O(15W)–H(15WA)···O(5)#6   | 0.75             | 2.732(4)         | 2.005            | 163.4  |
| O(15W)–H(15WB)···O(13W)#7 | 0.75             | 2.783(5)         | 2.005            | 163.8  |

**Table S2. Emission and excitation maxima wavelengths (nm)**

| polymer             | HL  | 1   | 2   | 3   | 4   | 5   |
|---------------------|-----|-----|-----|-----|-----|-----|
| $\lambda_{em}$ (nm) | 480 | 468 | 481 | 429 | 481 | 450 |
| $\lambda_{ex}$ (nm) | 370 | 369 | 391 | 321 | 371 | 375 |

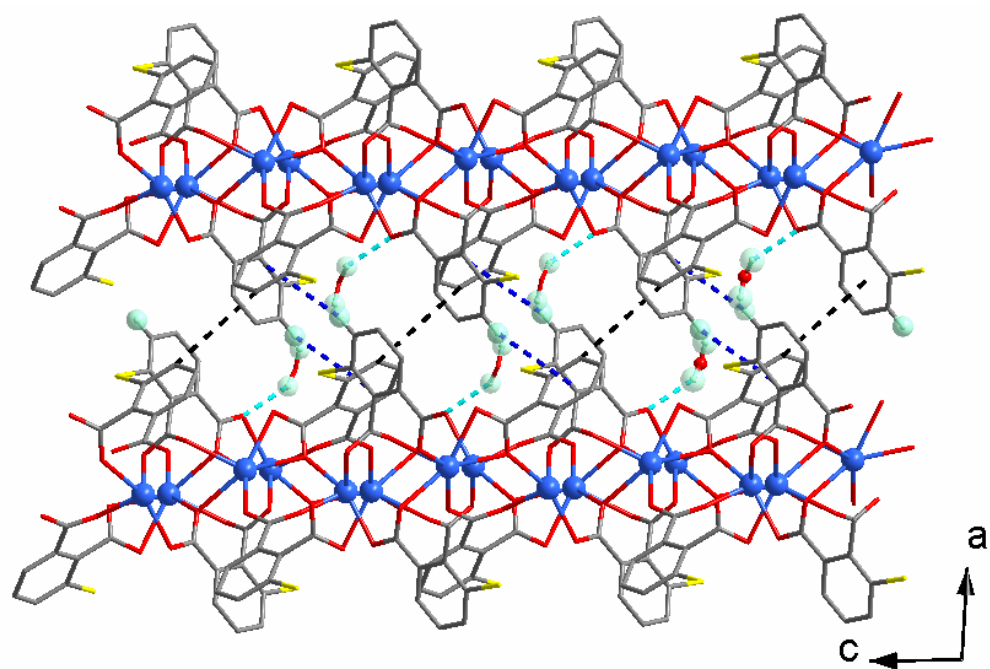

**Figure S1.** 3D supramolecular network for compound 1.

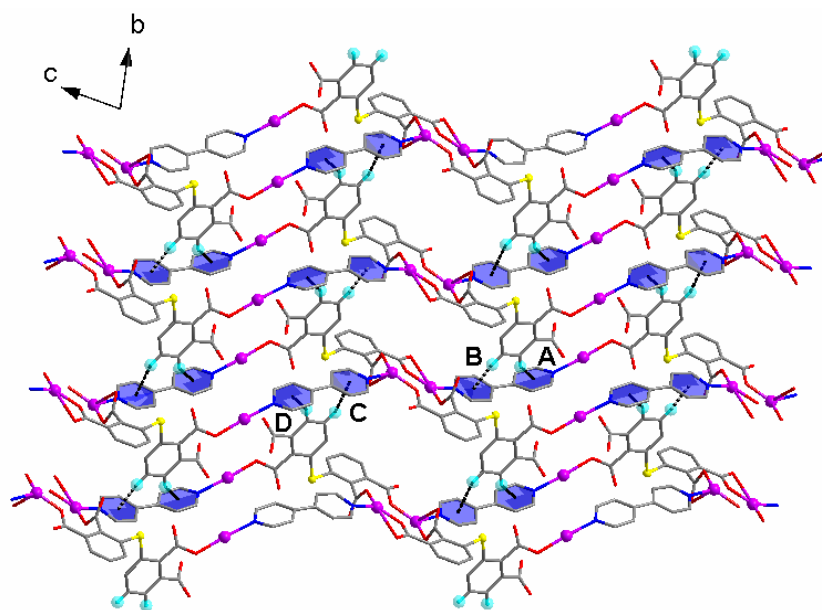

**Figure S2.** In compound 5, 3D network is formed by the inter-chain C–H $\cdots$  $\pi$  interactions between 2D layers.

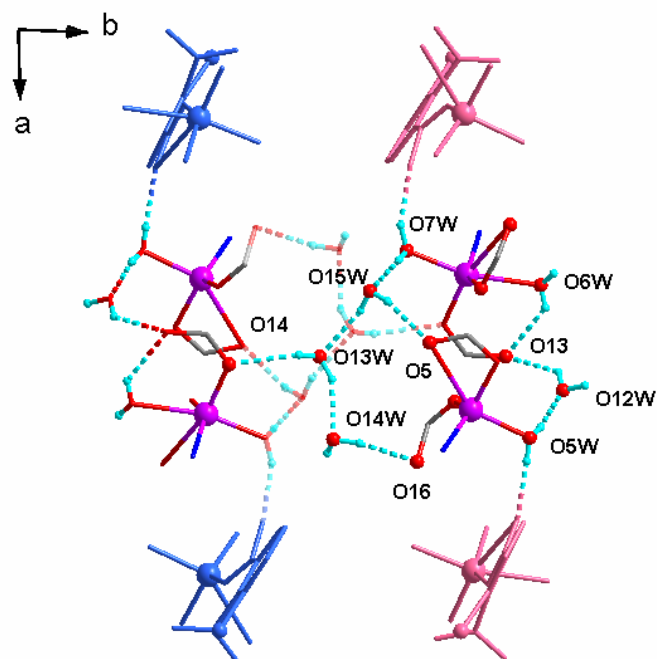

**Figure S3.** Representation of the solvent water found in the channels of compound 5.

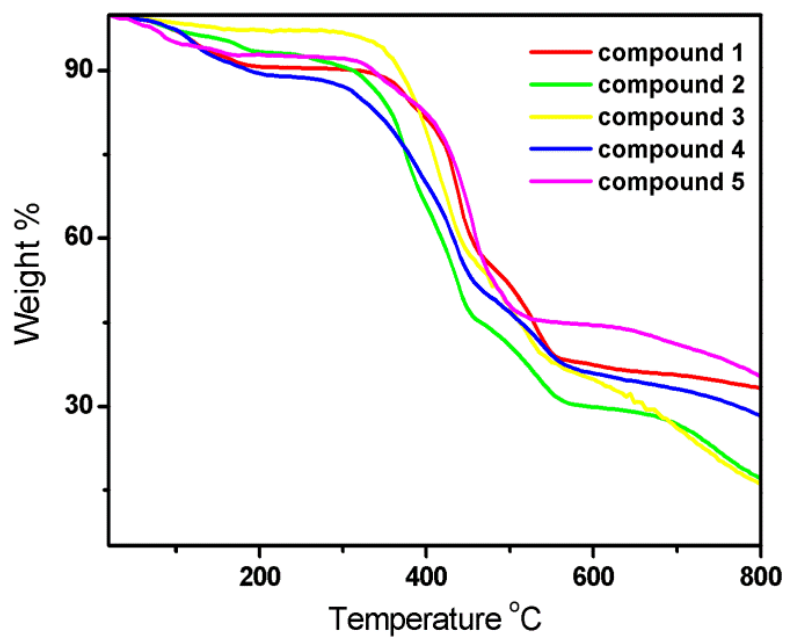

**Figure S4.** Thermogravimetric curve of the complexes.

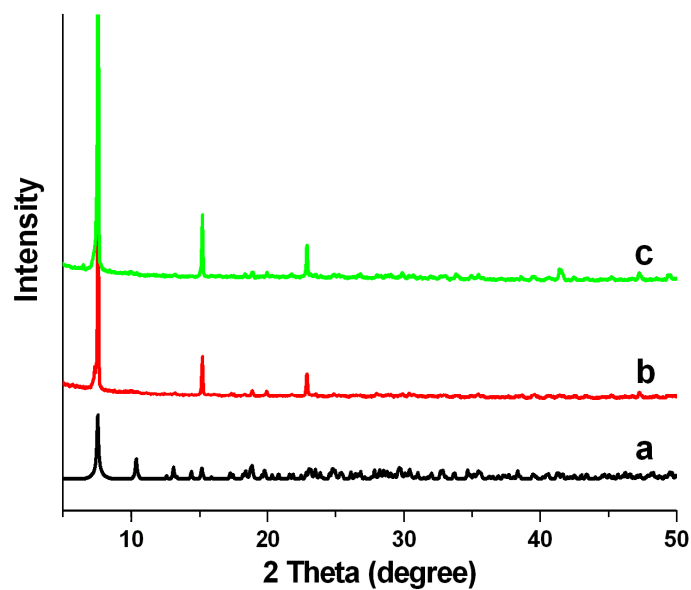

**Figure. S5.** X-ray powder diffraction of complex **1**. (a) Simulated from single crystal data. (b) observed for complex **1**. (c) Heated to 100°C at vacuum.

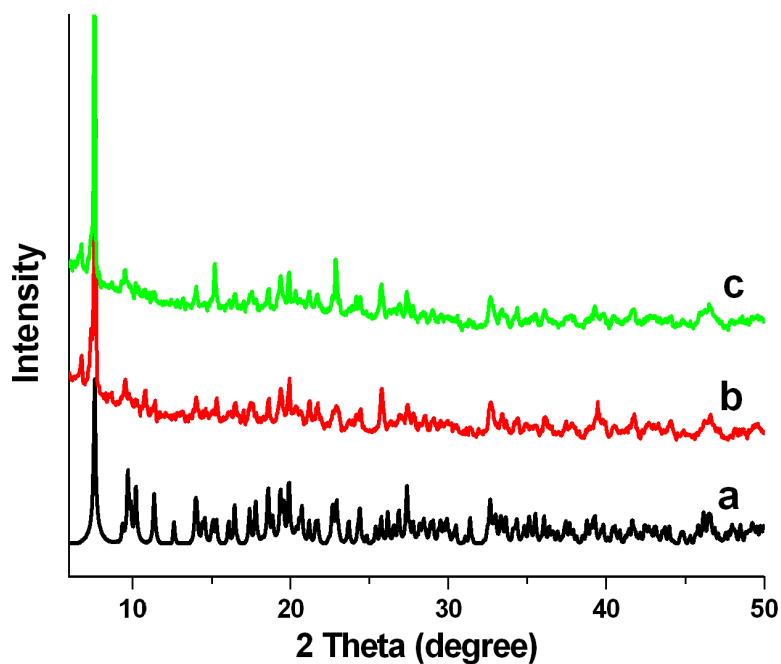

**Figure. S6.** X-ray powder diffraction of complex **2**. (a) Simulated from single crystal data. (b) observed for complex **2**. (c) Heated to 100°C at vacuum.

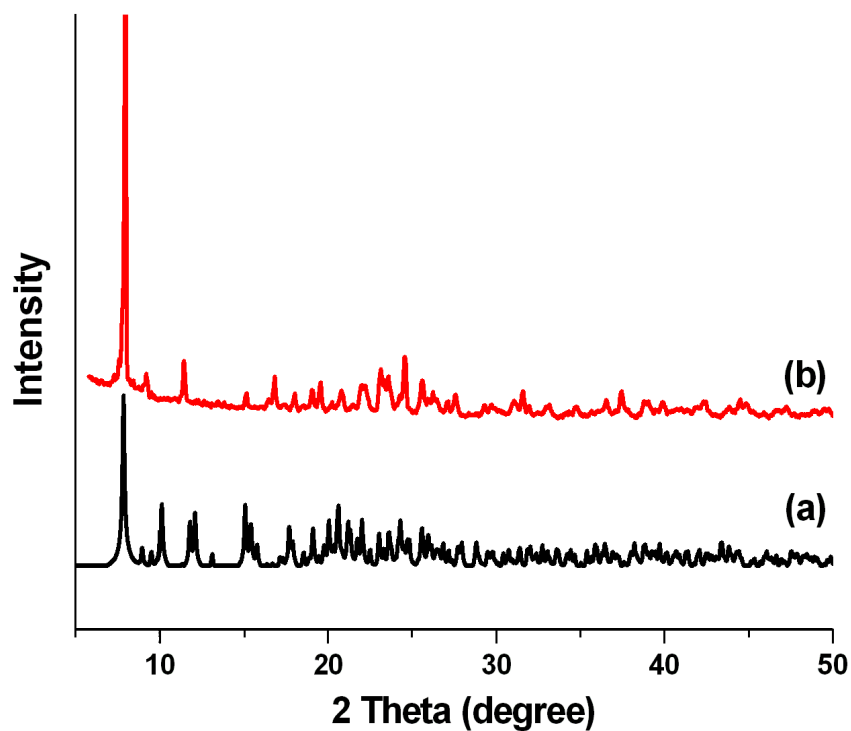

**Figure. S7.** X-ray powder diffraction of complex 3. (a) Simulated from single crystal data. (b) observed for complex 3 at vacuum.

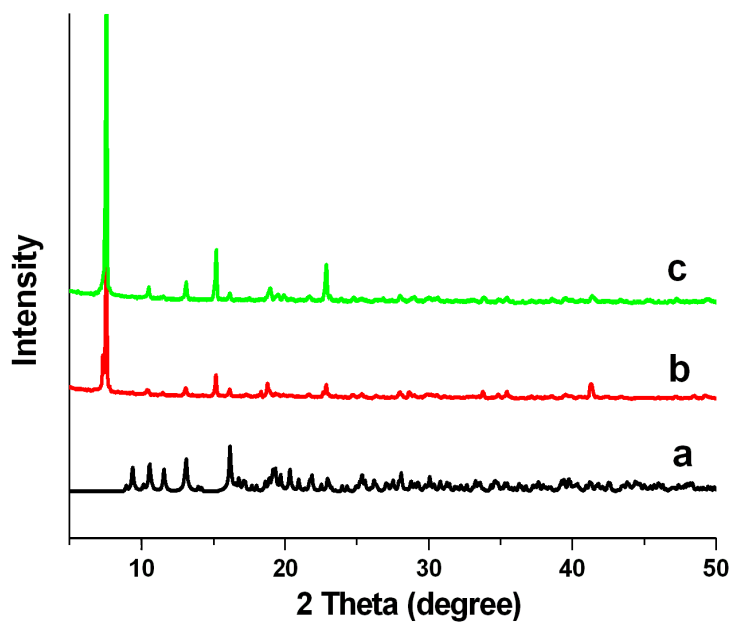

**Figure. S8.** X-ray powder diffraction of complex 4. (a) Simulated from single crystal data. (b) observed for complex 4. (c) Heated to 100°C at vacuum.

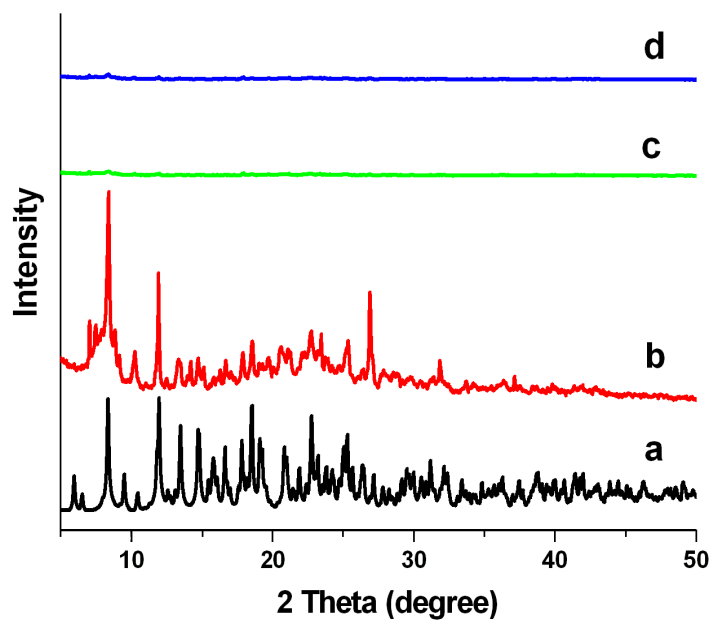

**Figure. S9.** X-ray powder diffraction of complex **5**. (a) Simulated from single crystal data, (b) observed for complex **5**. (c) Heated to 100°C at vacuum. (d) rehydrated sample for **5**.
